# Supplementary material for: Natural Selection and Functional Potentials of Human Noncoding Elements Revealed by Analysis of Next Generation Sequencing Data
Source: PLOS journal article supplement (doi:10.1371/journal.pone.0129023), 2015-06-08

logarithm of length to base 10

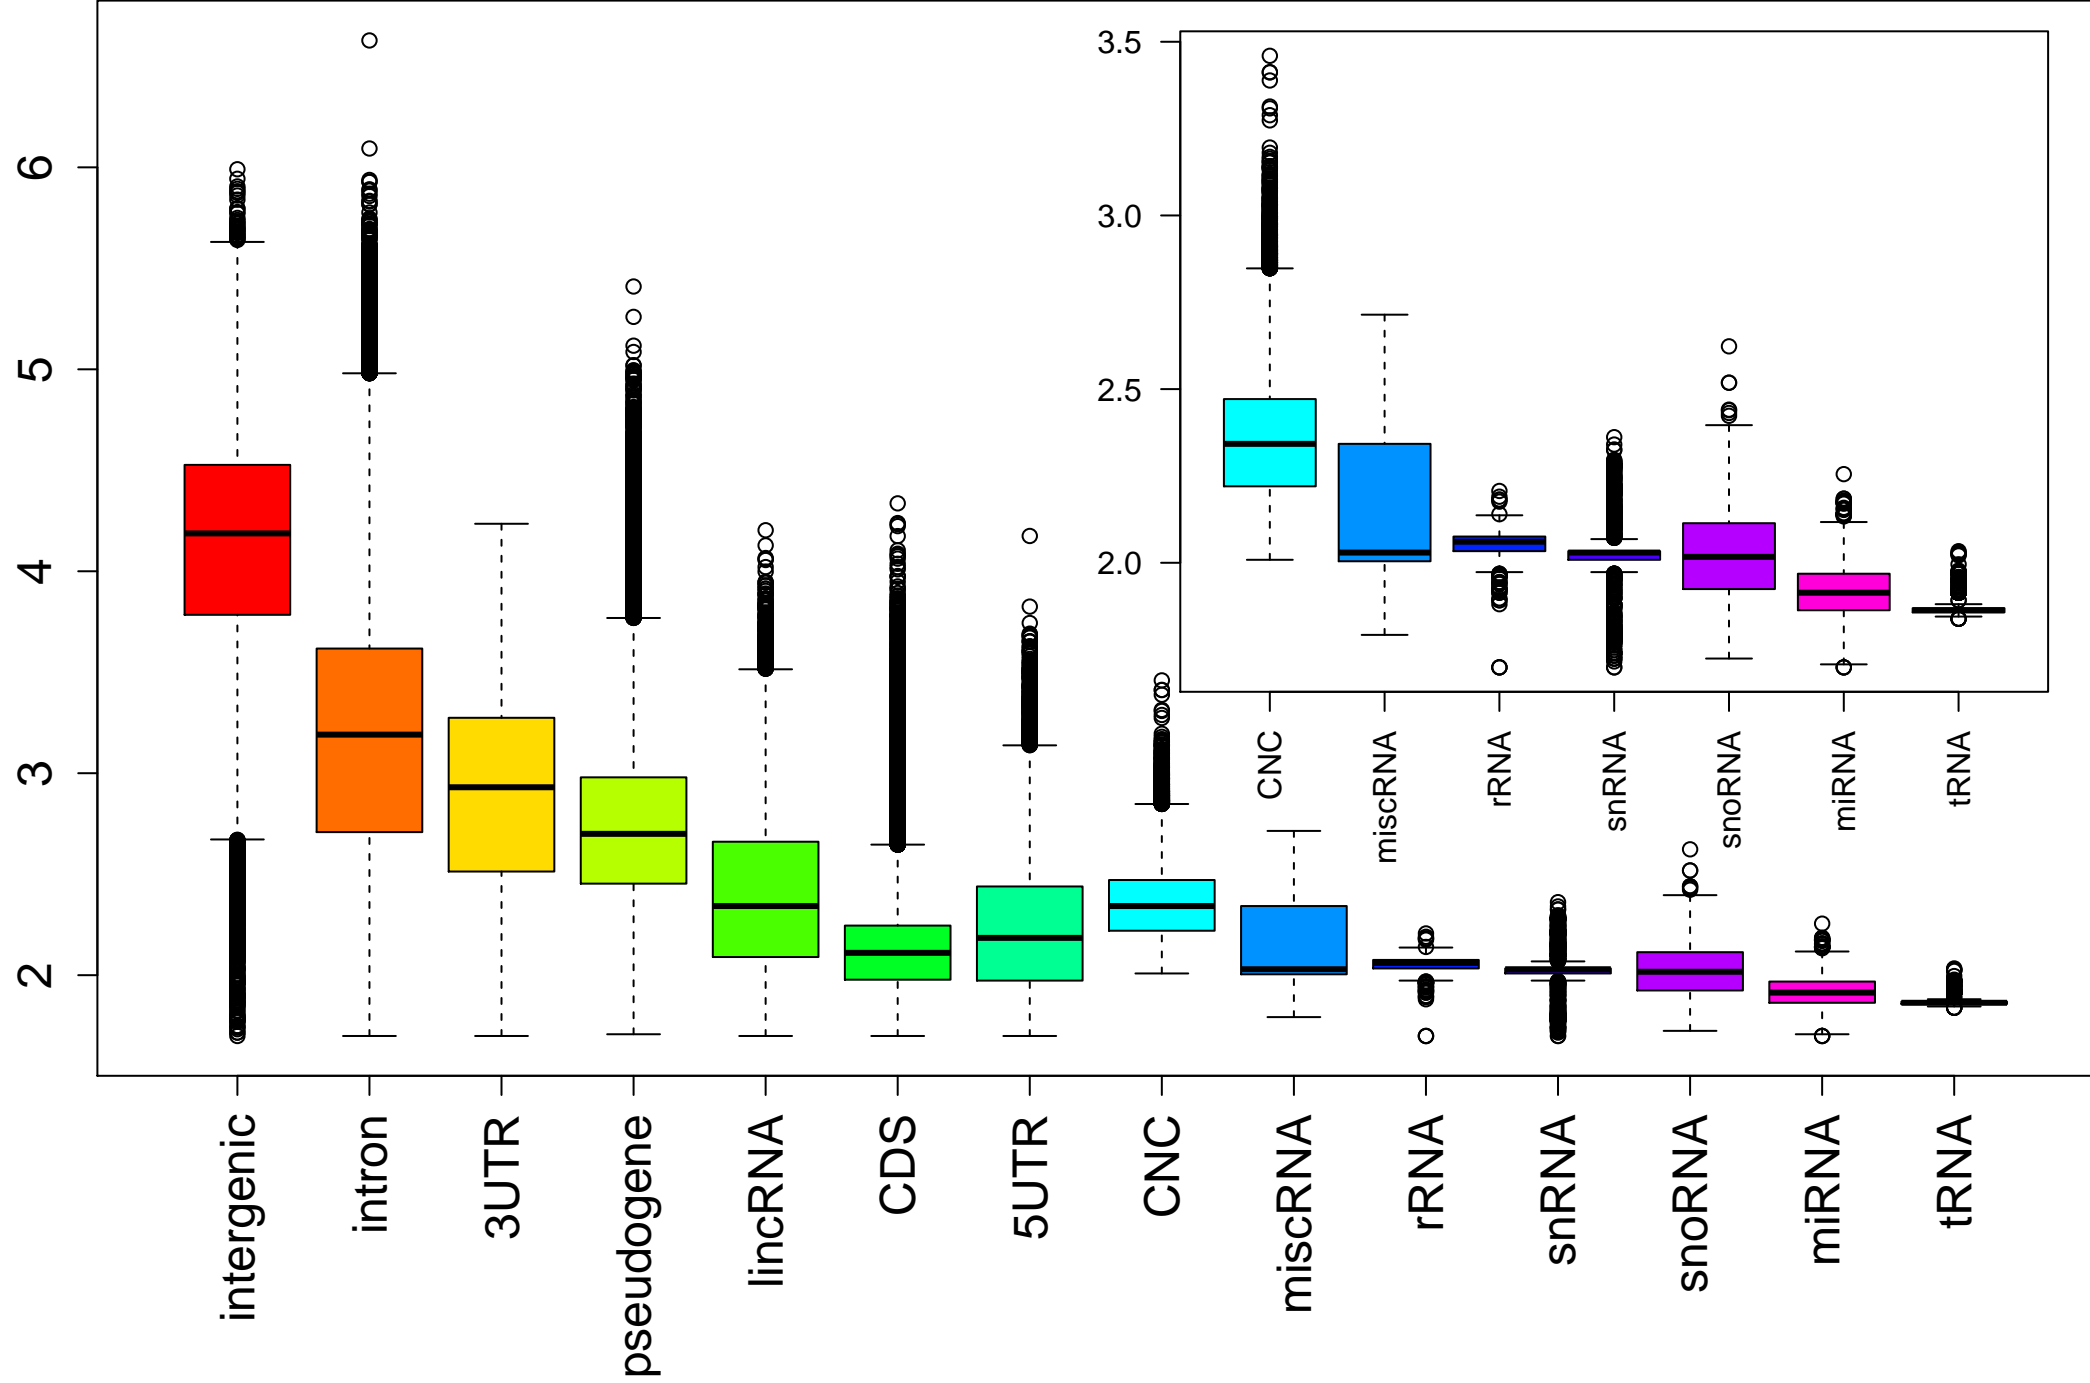

Supplement: S1 (10.1371/journal.pone.0129023.s001) [file journal.pone.0129023.s001]
